# Supplementary material for: Genomic and Phenotypic Alterations of the Neuronal-Like Cells Derived from Human Embryonal Carcinoma Stem Cells (NT2) Caused by Exposure to Organophosphorus Compounds Paraoxon and Mipafox
Source: MDPI journal article supplement (doi:10.3390/ijms15010905), 2014-01-09
Supplement: s2 [file s2]

## Sheet: all
Probe	Symbol	Description	GenBank	Gene	UniGene	PubMed	Gene Ontology	Pathway	F-statistic	p-value	FC real	Ctrl_A_96h	Ctrl_B_96h	Ctrl_C_96h	PXN_A_96h	PXN_B_96h	PXN_C_96h
A_23_P415411	HIST1H4E	histone cluster 1, H4e		8367	Hs.662174	9119399, 9439656, 9566873, 11080476, 11689053, 12408966, 12477932, 14657027		05322: Systemic lupus erythematosus	9.286	0.007	-1.69249	14.0682	13.6302	13.2213	11.9925	11.4843	12.3655
A_19_P00330133									8.739	0.009	-1.69023	11.222	11.0837	10.5404	9.67051	8.86111	9.24377
A_33_P3230090	LUZP6	leucine zipper protein 6		767558	Hs.602015	16344560, 16982933			8.403	0.01	-1.56504	11.3609	11.0786	10.5808	9.71641	9.17985	9.42897
A_19_P00327588									6.282	0.023	-1.39099	8.61938	8.09239	7.6738	7.10364	6.41187	6.6971
A_33_P3295091	LOC400804	hypothetical LOC400804		400804	Hs.722626	12477932			13.288	0.002	-1.2373	8.18444	8.32177	7.80243	7.22733	6.64561	6.72378
A_19_P00803130									18.807	0.001	-1.2361	8.11109	7.92861	7.65594	6.81149	6.57326	6.6026
A_24_P223384	HIST1H2AB	histone cluster 1, H2ab		8335	Hs.248174	6647026, 9119399, 9439656, 9566873, 11080476, 11689053, 12408966, 12477932, 14657027, 14993289, 15010469, 15078818, 15386022, 15635413, 15823041, 16359901, 16702407, 20379614	GO:0000786: nucleosome, GO:0003677: DNA binding, GO:0005634: nucleus, GO:0005694: chromosome, GO:0006334: nucleosome assembly	05322: Systemic lupus erythematosus	8.265	0.01	-1.23335	10.9202	10.783	10.3073	9.64734	9.06615	9.59688
A_24_P232790	C14orf162	chromosome 14 open reading frame 162		56936	Hs.458319	12477932, 15489334			13.522	0.002	-1.18827	10.1346	9.79748	9.5708	8.84487	8.14693	8.94628
A_23_P104762	YAP1	Yes-associated protein 1		10413	Hs.503692	7644498, 7782338, 9202023, 9305852, 10228168, 10562288, 11278422, 11278685, 11358867, 11604498, 11743730, 12118366, 12477932, 12535517, 12807903, 15023535, 15096513, 15302935, 15324660, 15800888, 15893728, 16061658, 16596258, 16772533, 16894141, 16964243, 17081983, 17110958, 17438369, 17502622, 17823615, 17889654, 17974916, 17980593, 18158288, 18175224, 18280240, 18413746, 18617895, 18640976, 187…	GO:0003713: transcription coactivator activity, GO:0003714: transcription corepressor activity, GO:0005515: protein binding, GO:0005634: nucleus, GO:0005737: cytoplasm, GO:0008283: cell proliferation, GO:0035329: hippo signaling cascade, GO:0045449: regulation of transcription, GO:0060242: contact inhibition		9.679	0.006	-1.14749	12.1144	11.7203	11.4981	10.5653	10.3594	10.9657
A_19_P00316726									9.819	0.006	-1.09067	9.95788	10.0243	9.67253	8.99646	8.6059	8.78032
A_23_P372923	FGFR1	fibroblast growth factor receptor 1		2260	Hs.264887	1317750, 1379697, 1379698, 1380281, 1650441, 1652059, 1662973, 1689310, 1697263, 1722570, 1722683, 1846977, 2159626, 2162671, 2167437, 2554327, 7514169, 7516330, 7537362, 7680645, 7761103, 7789168, 7874169, 8074689, 8125298, 8386828, 8417497, 8576175, 8622701, 8663044, 8692946, 8737680, 8752212, 8753773, 8756477, 8929854, 9139660, 9212826, 9373149, 9480847, 9632781, 9655399, 9660748, 9949182, 103…	GO:0000165: MAPKKK cascade, GO:0000166: nucleotide binding, GO:0001501: skeletal system development, GO:0001525: angiogenesis, GO:0001657: ureteric bud development, GO:0001701: in utero embryonic development, GO:0001759: induction of an organ, GO:0002053: positive regulation of mesenchymal cell proliferation, GO:0002062: chondrocyte differentiation, GO:0004713: protein tyrosine kinase activity, G…	04010: MAPK signaling pathway, 04520: Adherens junction, 04810: Regulation of actin cytoskeleton, 05200: Pathways in cancer, 05215: Prostate cancer, 05218: Melanoma	11.024	0.004	-1.04802	10.4527	10.2099	10.2458	9.58012	9.2014	8.98285
A_23_P214897	AKAP12	A kinase (PRKA) anchor protein 12		9590	Hs.371240	1522245, 9000000, 9238861, 9604001, 9880537, 10858453, 11309381, 11316952, 11766078, 11807172, 12477932, 12857743, 14657015, 15258566, 15345747, 15590635, 15923193, 16344560, 16642035, 16762919, 17081159, 17081983, 17200117, 17442483, 17442832, 17577780, 18029348, 18199717, 18397319, 18554502, 18579430, 18950703, 19210988, 19724895, 19851296, 20018890, 20198315	GO:0005737: cytoplasm, GO:0005856: cytoskeleton, GO:0005938: cell cortex, GO:0006605: protein targeting, GO:0007165: signal transduction, GO:0007186: G-protein coupled receptor protein signaling pathway, GO:0008179: adenylate cyclase binding, GO:0010739: positive regulation of protein kinase A signaling cascade, GO:0030819: positive regulation of cAMP biosynthetic process, GO:0051018: protein kin…		5.896	0.028	-1.03108	11.3126	11.2354	10.9384	9.85998	10.0295	10.5037
A_33_P3374215									6.16	0.025	-1.0191	8.2207	8.08576	7.59477	7.21786	6.74013	6.88592
A_33_P3390521	UBE2Z	ubiquitin-conjugating enzyme E2Z		65264	Hs.514297	12477932, 14702039, 15489334, 15761153, 16169070, 16189514, 16344560, 17160626, 17597759, 18029348	GO:0000166: nucleotide binding, GO:0004842: ubiquitin-protein ligase activity, GO:0005524: ATP binding, GO:0005634: nucleus, GO:0005730: nucleolus, GO:0005737: cytoplasm, GO:0006915: apoptosis, GO:0016874: ligase activity, GO:0043687: post-translational protein modification, GO:0051246: regulation of protein metabolic process	04120: Ubiquitin mediated proteolysis	8.71	0.009	-1.01031	8.13087	8.13563	8.23797	7.30364	7.39466	6.77522
A_33_P3372705	SRGAP2P2	SLIT-ROBO Rho GTPase activating protein 2 pseudogene 2		647135	Hs.632517	12477932			9.361	0.007	-1.01006	10.5634	10.1746	9.98799	9.61548	8.86639	9.21398
A_24_P298027	AXIN2	axin 2		8313	Hs.156527	8889548, 9566905, 10021369, 10049590, 10647780, 10966653, 11017067, 11438668, 11474173, 11940574, 12072559, 12183362, 12477932, 15042511, 15304487, 15489334, 15611123, 15766563, 16247484, 16344560, 16432638, 16601693, 16820935, 16941501, 17002498, 17072303, 17143297, 17373666, 17927870, 18330950, 18372914, 18384130, 18676680, 18683894, 18708403, 18755497, 18790474, 19065536, 19119171, 19170196, 1…	GO:0001756: somitogenesis, GO:0001934: positive regulation of protein amino acid phosphorylation, GO:0001957: intramembranous ossification, GO:0004871: signal transducer activity, GO:0005622: intracellular, GO:0005634: nucleus, GO:0005737: cytoplasm, GO:0005813: centrosome, GO:0007275: multicellular organismal development, GO:0008013: beta-catenin binding, GO:0008285: negative regulation of cell …	04310: Wnt signaling pathway, 05200: Pathways in cancer, 05210: Colorectal cancer, 05213: Endometrial cancer, 05217: Basal cell carcinoma	7.939	0.012	-1.00292	8.18499	7.97961	7.74704	6.96637	6.93418	7.00233
A_33_P3378707	LOC646214	p21-activated kinase 2 pseudogene		646214	Hs.510697				19.191	0	1.00429	9.58356	9.91467	9.84583	10.8968	10.8469	10.6132
A_33_P3253460	LOC100130654	hypothetical protein LOC100130654		100130654	Hs.636509	14702039			6.318	0.023	1.00461	10.3349	9.46585	9.43289	10.6379	10.5017	11.1078
A_19_P00808589									10.461	0.005	1.00514	9.00683	9.13389	9.32941	10.0914	10.2285	10.1656
A_19_P00809160									10.95	0.004	1.0072	7.44769	7.62263	7.62099	8.67149	8.28739	8.75402
A_33_P3313929	CCR6	chemokine (C-C motif) receptor 6		1235	Hs.46468	8125298, 8886020, 9070937, 9169459, 9186513, 9223454, 9294137, 9294138, 9373149, 10521347, 11001880, 11164896, 11714836, 11751947, 11994436, 12067311, 12070001, 12081481, 12149255, 12193700, 12477932, 12514792, 12642342, 14574404, 15483227, 15489334, 15591779, 15701269, 15972662, 16095490, 16215992, 16344560, 16622267, 16641550, 17075975, 17133360, 17171755, 17562763, 17615381, 18097022, 18218038…	GO:0004872: receptor activity, GO:0004930: G-protein coupled receptor activity, GO:0004950: chemokine receptor activity, GO:0005515: protein binding, GO:0005886: plasma membrane, GO:0005887: integral to plasma membrane, GO:0006928: cellular component movement, GO:0006935: chemotaxis, GO:0006955: immune response, GO:0006959: humoral immune response, GO:0006968: cellular defense response, GO:000716…	04060: Cytokine-cytokine receptor interaction, 04062: Chemokine signaling pathway	8.512	0.009	1.01052	7.76711	7.85906	6.99599	8.54752	8.42881	8.67738
A_33_P3397795	C14orf135	chromosome 14 open reading frame 135		64430	Hs.509499	11230166, 12477932, 14702039, 15489334, 16189514, 16237761, 18029348	GO:0016020: membrane, GO:0016021: integral to membrane		7.976	0.012	1.01175	9.97303	10.0884	9.81873	10.8022	10.9962	11.117
A_33_P3420852	KIRREL2	kin of IRRE like 2 (Drosophila)		84063	Hs.145729	8889548, 11230166, 12477932, 12504092, 12837264, 12975309, 15340161, 15489334, 16741999, 19703278, 20237496	GO:0005886: plasma membrane, GO:0007155: cell adhesion, GO:0016021: integral to membrane		9.397	0.007	1.01399	9.24582	8.57874	8.55466	9.81452	9.44295	10.1637
A_32_P45974	C2orf27A	chromosome 2 open reading frame 27A		29798	Hs.635289, Hs.655680	8619474, 9110174, 12477932, 15489334, 15815621			21.175	0	1.01703	6.51654	6.64197	6.69518	7.69672	7.70379	7.50429
A_33_P3286789									10.001	0.005	1.021	6.53794	6.72167	6.70015	7.77608	7.71559	7.53111
A_19_P00801142									7.33	0.015	1.02358	8.82846	8.48248	8.21872	9.50242	9.22315	9.87486
A_33_P3322430									10.219	0.005	1.02436	11.3767	11.3088	11.1093	12.1396	12.1914	12.537
A_33_P3241596									8.648	0.009	1.0314	11.8629	12.1048	11.6104	12.7645	12.7957	13.1122
A_33_P3365878	BMP8B	bone morphogenetic protein 8b		656	Hs.664022	1460021, 7757816, 9070944, 10894154, 11427739, 12477932, 15063762, 16314833, 16710414, 17474147, 20379614	GO:0001501: skeletal system development, GO:0001503: ossification, GO:0005125: cytokine activity, GO:0005515: protein binding, GO:0005576: extracellular region, GO:0005615: extracellular space, GO:0007275: multicellular organismal development, GO:0008083: growth factor activity, GO:0030154: cell differentiation, GO:0040007: growth, GO:0051216: cartilage development	04340: Hedgehog signaling pathway, 04350: TGF-beta signaling pathway	9.51	0.006	1.03371	12.2965	12.1466	12.049	13.065	13.0041	13.5242
A_24_P66838									30.866	0	1.03775	6.71823	6.9574	6.89099	7.82532	7.77001	8.08452
A_24_P58894									10.164	0.005	1.04022	10.5708	10.8501	10.8685	11.9103	11.9557	11.5439
A_24_P297480	RNF113B	ring finger protein 113B		140432	Hs.296045	12477932, 15057823, 15489334	GO:0003676: nucleic acid binding, GO:0005515: protein binding, GO:0008270: zinc ion binding, GO:0046872: metal ion binding		14.771	0.001	1.04531	6.98536	6.89926	7.18447	7.81543	8.15246	8.23715
A_24_P203814									10.265	0.005	1.04994	8.88957	9.11785	9.12957	9.9983	10.1336	10.1549
A_19_P00806684									14.058	0.002	1.05147	7.45888	7.20156	7.29938	8.15422	8.24569	8.71432
A_33_P3265606	GCLM	glutamate-cysteine ligase, modifier subunit		2730	Hs.315562	7826375, 7829101, 8825659, 8978789, 9675072, 9841137, 9841880, 9895302, 10395918, 10674357, 12081989, 12477932, 12975258, 14532974, 15451055, 15489334, 15946948, 16081425, 16183645, 16599007, 16677451, 16710414, 16712791, 16766924, 16909399, 17333241, 17344309, 17353931, 17548779, 17643973, 17924854, 17961430, 18066575, 18449862, 18560528, 18614560, 18991850, 19056482, 19126404, 19153097, 1942010…	GO:0004357: glutamate-cysteine ligase activity, GO:0004357: glutamate-cysteine ligase activity, GO:0005515: protein binding, GO:0005625: soluble fraction, GO:0005829: cytosol, GO:0006534: cysteine metabolic process, GO:0006536: glutamate metabolic process, GO:0006750: glutathione biosynthetic process, GO:0006750: glutathione biosynthetic process, GO:0006979: response to oxidative stress, GO:00164…	00480: Glutathione metabolism, 01100: Metabolic pathways	9.559	0.006	1.06001	12.0851	12.153	11.7261	13.2928	12.8949	12.9566
A_33_P3297599									5.572	0.033	1.06094	13.0268	13.0288	12.7319	13.9669	13.8313	14.1721
A_33_P3280811	TTC16	tetratricopeptide repeat domain 16		158248	Hs.642748	12477932, 14702039, 15164053, 15489334	GO:0005488: binding		15.56	0.001	1.06568	7.58312	8.02824	8.12213	8.82387	8.89345	9.21322
A_32_P144342	PARP4	poly (ADP-ribose) polymerase family, member 4		143	Hs.117825	7937745, 8724849, 10100603, 10477748, 10551828, 10644454, 11291045, 11479319, 11855821, 12101391, 12123754, 12140175, 12404116, 12477932, 12829019, 15057823, 15169895, 15781132, 16344560, 17203305, 18676680, 19170196, 19536092, 19625176, 19692168, 20379614	GO:0003677: DNA binding, GO:0003950: NAD+ ADP-ribosyltransferase activity, GO:0003950: NAD+ ADP-ribosyltransferase activity, GO:0005622: intracellular, GO:0005634: nucleus, GO:0005737: cytoplasm, GO:0005856: cytoskeleton, GO:0005876: spindle microtubule, GO:0006281: DNA repair, GO:0006464: protein modification process, GO:0006471: protein amino acid ADP-ribosylation, GO:0006810: transport, GO:000…	03410: Base excision repair	11.773	0.003	1.06583	6.8059	6.89407	6.94421	7.89798	7.85451	8.08918
A_33_P3337719	LOC100134868	hypothetical LOC100134868		100134868	Hs.516956	12477932			9.149	0.007	1.0661	9.34711	9.44574	9.15031	10.4274	10.109	10.6051
A_33_P3286709									6.914	0.018	1.0668	6.37017	6.27874	6.56857	7.21648	7.64719	7.55421
A_24_P195286									11.008	0.004	1.07531	7.42901	7.52377	7.53871	8.52629	8.54264	8.64848
A_33_P3386288	SCD5	stearoyl-CoA desaturase 5		79966	Hs.379191	12477932, 12727354, 12815040, 15610069, 15907797, 16712791, 16806233, 17468887, 20379614	GO:0004768: stearoyl-CoA 9-desaturase activity, GO:0005506: iron ion binding, GO:0005783: endoplasmic reticulum, GO:0005789: endoplasmic reticulum membrane, GO:0006633: fatty acid biosynthetic process, GO:0016020: membrane, GO:0016021: integral to membrane, GO:0016491: oxidoreductase activity, GO:0046872: metal ion binding, GO:0055114: oxidation reduction	01040: Biosynthesis of unsaturated fatty acids, 03320: PPAR signaling pathway	9.198	0.007	1.07806	6.52164	6.75661	6.79865	7.85145	8.00348	7.45616
A_33_P3228402									7.631	0.013	1.07945	11.8441	11.9739	11.8393	12.9434	12.7906	13.1616
A_33_P3273000	PTK2B	PTK2B protein tyrosine kinase 2 beta		2185	Hs.491322	1718748, 7499242, 7529876, 7544443, 7673154, 8497321, 8792832, 8798684, 8838818, 8849729, 8939945, 8995252, 9020138, 9091579, 9099734, 9104812, 9242628, 9344848, 9362541, 9402324, 9422762, 9442086, 9446638, 9512511, 9545257, 9560226, 9565592, 9621077, 9750131, 9858471, 10022914, 10022920, 10082674, 10194422, 10322114, 10329689, 10354709, 10356363, 10518561, 10521452, 10702271, 10708762, 10713673,…	GO:0000165: MAPKKK cascade, GO:0000166: nucleotide binding, GO:0001525: angiogenesis, GO:0001556: oocyte maturation, GO:0001666: response to hypoxia, GO:0004713: protein tyrosine kinase activity, GO:0004715: non-membrane spanning protein tyrosine kinase activity, GO:0004871: signal transducer activity, GO:0005515: protein binding, GO:0005524: ATP binding, GO:0005634: nucleus, GO:0005737: cytoplas…	04020: Calcium signaling pathway, 04062: Chemokine signaling pathway, 04650: Natural killer cell mediated cytotoxicity, 04670: Leukocyte transendothelial migration, 04912: GnRH signaling pathway	8.058	0.011	1.08026	9.79748	9.77113	9.69396	10.8903	10.6283	10.9848
A_33_P3224971									11.479	0.003	1.08032	11.9507	11.8306	11.5402	12.7412	12.6438	13.1774
A_33_P3384694									7.669	0.013	1.08391	7.39737	7.28678	7.19147	8.08742	7.978	9.06191
A_24_P384029									7.321	0.015	1.08884	6.77864	6.87874	7.14701	8.00368	8.13766	7.92957
A_33_P3321678									8.417	0.01	1.09055	8.92685	9.08078	8.82984	10.0023	9.8795	10.2273
A_19_P00806292									6.222	0.024	1.09269	8.81192	8.3006	7.90659	9.20221	8.988	10.107
A_33_P3294961	LAT2	linker for activation of T cells family, member 2		7462	Hs.647049	8125298, 8808592, 8812460, 9373149, 11003705, 11042152, 11124535, 12477932, 12486104, 12514734, 12853948, 14702039, 14722116, 15010370, 15153499, 15489334, 15745852, 16160011, 16713569, 17277102, 17993265, 18645037, 19183565, 19343046, 19808856, 19879355	GO:0005515: protein binding, GO:0005886: plasma membrane, GO:0016021: integral to membrane, GO:0019722: calcium-mediated signaling, GO:0023034: intracellular signaling pathway, GO:0042113: B cell activation, GO:0042113: B cell activation, GO:0042169: SH2 domain binding, GO:0043303: mast cell degranulation, GO:0045121: membrane raft, GO:0050853: B cell receptor signaling pathway		6.994	0.017	1.09544	11.1728	11.2975	10.789	12.0929	11.9391	12.5137
A_33_P3210975									15.941	0.001	1.09667	7.18858	7.57352	7.75089	8.57154	8.61075	8.62071
A_33_P3312802	RPL13AP17	ribosomal protein L13a pseudogene 17		399670	Hs.568045	12477932, 15479637, 19123937			7.836	0.012	1.10215	9.98078	9.52753	9.5621	10.6359	10.5316	11.2094
A_24_P409402									8.56	0.009	1.10387	11.6847	11.3212	11.7276	12.738	12.7208	12.5863
A_33_P3279501									12.187	0.003	1.11151	6.41158	6.56519	6.70722	7.70408	7.88769	7.42675
A_23_P117971									6.881	0.018	1.12176	12.2934	12.3296	11.9112	13.1971	13.1055	13.5968
A_33_P3297452									16.213	0.001	1.13265	6.98097	6.97955	6.92645	8.03427	7.89305	8.3576
A_24_P127312									8.39	0.01	1.13401	13.5879	13.9564	13.9295	14.9078	14.984	14.984
A_19_P00329691									11.91	0.003	1.14144	8.13267	8.36398	8.42448	9.37791	9.66537	9.30217
A_33_P3357626									7.658	0.013	1.15956	10.9849	10.7922	11.0595	11.9237	12.1306	12.2611
A_19_P00801106									19.724	0	1.16003	8.71987	8.80149	8.64489	10.0228	9.56357	10.06
A_24_P175563	ACBD5	acyl-CoA binding domain containing 5		91452	Hs.530597	12056414, 12477932, 14702039, 15342556, 16385451	GO:0000062: acyl-CoA binding, GO:0006810: transport, GO:0008289: lipid binding, GO:0016020: membrane, GO:0016021: integral to membrane		13.272	0.002	1.16239	6.14489	6.33496	6.52173	7.41858	7.77222	7.29794
A_23_P350059	C1orf152	profilin 1 pseudogene		767846	Hs.657186	11948409, 12477932			6.15	0.025	1.16554	12.4294	11.92	12.1107	12.9576	13.1922	13.8069
A_33_P3283237	YY2	YY2 transcription factor		404281	Hs.443490, Hs.673601	12477932, 14702039, 15087442, 16260628, 16344560, 16377127, 17478514, 19026728, 19710015, 20215434	GO:0003677: DNA binding, GO:0005622: intracellular, GO:0005634: nucleus, GO:0008270: zinc ion binding, GO:0045449: regulation of transcription, GO:0046872: metal ion binding		26.913	0	1.17564	9.17226	9.15355	8.96901	10.3346	9.99144	10.4957
A_33_P3352980									13.059	0.002	1.19448	8.19244	8.38911	8.07983	9.40016	9.2617	9.58295
A_33_P3274179	LOC100133791	hypothetical protein LOC100133791		100133791					6.697	0.02	1.20709	6.47752	6.36243	6.7425	7.7018	7.73964	7.76228
A_33_P3392123	LOC100233209	hypothetical LOC100233209		100233209	Hs.657722	14702039, 16344560			12.433	0.002	1.24488	8.50117	8.55865	8.41324	9.76933	9.49591	9.94245
A_33_P3325808									9.813	0.006	1.25566	7.55722	7.49629	7.55964	8.77136	8.68503	8.92375
A_23_P109907	ILDR1	immunoglobulin-like domain containing receptor 1		286676	Hs.98484	12477932, 14702039, 15381095, 15489334, 20379614	GO:0004872: receptor activity, GO:0005737: cytoplasm, GO:0005829: cytosol, GO:0005886: plasma membrane, GO:0016021: integral to membrane		7.524	0.014	1.25785	13.7169	13.7179	13.4711	14.7557	14.9148	15.0089
A_33_P3667484	LOC648740	actin, beta pseudogene		648740	Hs.721681				7.654	0.013	1.28474	11.8444	11.8312	11.6895	13.1457	12.8794	13.1942
A_19_P00805929									12.799	0.002	1.2868	7.27715	6.99064	7.16485	8.04752	8.30991	8.93562
A_19_P00316067									6.861	0.018	1.28699	6.8213	6.97005	7.63706	8.23397	8.37652	8.6789
A_24_P917866	SET	SET nuclear oncogene		6418	Hs.436687	1630450, 7753797, 8125298, 8131851, 8192856, 8294483, 8626647, 9353299, 9373149, 9773788, 11018049, 11073993, 11076863, 11163245, 11231286, 11555662, 11741927, 11909973, 11978794, 12107410, 12407107, 12444089, 12477932, 12524539, 12628186, 14612398, 14671643, 14759373, 15136563, 15146197, 15164053, 15173575, 15342556, 15489334, 15489336, 15556635, 15642345, 15930275, 15931263, 16061203, 16189514,…	GO:0004864: phosphoprotein phosphatase inhibitor activity, GO:0005515: protein binding, GO:0005634: nucleus, GO:0005654: nucleoplasm, GO:0005737: cytoplasm, GO:0005783: endoplasmic reticulum, GO:0005829: cytosol, GO:0006260: DNA replication, GO:0006334: nucleosome assembly, GO:0006337: nucleosome disassembly, GO:0006913: nucleocytoplasmic transport, GO:0008601: protein phosphatase type 2A regulat…		10.336	0.005	1.28895	11.7416	11.7761	11.7376	12.8776	13.0736	13.1709
A_32_P34	LOC100131581	hypothetical LOC100131581		100131581	Hs.638992	14702039			9.104	0.007	1.29187	10.3034	10.1725	10.3025	11.6872	11.4124	11.5544
A_24_P277367	CXCL5	chemokine (C-X-C motif) ligand 5		6374	Hs.89714	1744577, 7828901, 7929219, 7999089, 8083342, 8580362, 8702798, 9252512, 9365115, 9692902, 10068592, 10095777, 10463948, 10820279, 11106948, 11468158, 12468547, 12477932, 12665801, 12680872, 12751040, 12950257, 13679321, 13679391, 14644041, 14711052, 14967364, 15021975, 15489334, 15714497, 16567110, 16574090, 16635746, 17022986, 17052298, 17428364, 17479287, 17549409, 17703412, 17761179, 17878384,…	GO:0005576: extracellular region, GO:0005615: extracellular space, GO:0006935: chemotaxis, GO:0006955: immune response, GO:0007165: signal transduction, GO:0007267: cell-cell signaling, GO:0008009: chemokine activity, GO:0008284: positive regulation of cell proliferation	04060: Cytokine-cytokine receptor interaction, 04062: Chemokine signaling pathway	12.16	0.003	1.29504	9.35935	9.6493	9.61812	10.6878	10.8941	10.93
A_23_P59888	NACAP1	nascent-polypeptide-associated complex alpha polypeptide pseudogene 1		83955	Hs.567608, Hs.723574	12477932, 17353931, 19615732	GO:0005515: protein binding		6.84	0.018	1.29676	12.8633	12.8393	12.8913	14.0615	14.0591	14.3635
A_19_P00811200									4.892	0.046	1.30035	7.41323	7.22389	7.1949	8.15408	8.78169	8.79731
A_24_P662366									11.883	0.003	1.30504	8.77729	9.05153	8.95779	10.1872	9.98617	10.5283
A_33_P3317473									17.667	0.001	1.31097	8.66199	8.75259	8.71561	9.93351	9.89727	10.2323
A_33_P3354728									9.202	0.007	1.312	8.86548	9.06488	9.12646	10.3842	10.3945	10.2141
A_19_P00320509									7.286	0.015	1.31564	8.99688	8.82078	9.22209	10.1247	10.5026	10.3594
A_33_P3358851									12.161	0.003	1.32854	6.44471	7.03569	6.94068	8.09109	8.31882	7.99677
A_19_P00801713									12.303	0.003	1.33421	11.5364	11.6538	11.691	13.1037	13.2579	12.5223
A_33_P3293753	KRTAP10-9	keratin associated protein 10-9		386676	Hs.474000	10830953, 12477932, 14962103, 15028290	GO:0045095: keratin filament		5.671	0.031	1.33451	7.60603	7.5274	7.93384	8.79783	9.33598	8.937
A_19_P00802929									15.626	0.001	1.33922	8.01551	8.30025	8.30353	9.5136	9.47093	9.6524
A_33_P3376925									6.894	0.018	1.34214	7.7035	7.69307	7.6274	8.94563	8.95672	9.14805
A_33_P3222018	CBX3	chromobox homolog 3		11335	Hs.381189	8663349, 9169472, 9454751, 9636146, 9636147, 9864353, 10330177, 10460410, 10562550, 10664448, 11101528, 11124534, 11242053, 11336697, 11793364, 11959914, 12004135, 12054505, 12414990, 12477932, 12485163, 12560555, 12690205, 15009096, 15120635, 15322135, 15489334, 15502821, 15635413, 16083285, 16127177, 16713569, 16945326, 16954381, 16964243, 17081983, 17245432, 17381543, 17468742, 17540172, 17575…	GO:0000779: condensed chromosome, centromeric region, GO:0000785: chromatin, GO:0003682: chromatin binding, GO:0005515: protein binding, GO:0005634: nucleus, GO:0005635: nuclear envelope, GO:0005637: nuclear inner membrane, GO:0005719: nuclear euchromatin, GO:0005720: nuclear heterochromatin, GO:0005819: spindle, GO:0006333: chromatin assembly or disassembly, GO:0006338: chromatin remodeling, GO:…		9.941	0.005	1.37449	6.78921	6.87927	7.24219	8.19576	8.6743	8.16406
A_33_P3415221									8.154	0.011	1.38141	13.4329	13.1599	12.9004	14.4936	14.2428	14.901
A_24_P865672									12.333	0.003	1.38895	6.59829	6.77656	6.90096	8.04129	8.42462	7.97674
A_33_P3424339									5.892	0.028	1.38955	10.1078	10.1812	10.2268	11.6573	11.5437	11.4834
A_33_P3384900	SNRPD2P2	small nuclear ribonucleoprotein D2 pseudogene 2		645339	Hs.382049	12477932			17.038	0.001	1.39064	9.78938	9.94393	10.1571	11.2865	11.6153	11.1605
A_24_P323635									10.6	0.004	1.39309	12.9259	12.8855	12.6633	14.2641	14.0541	14.3357
A_24_P289043									8.371	0.01	1.39791	6.29016	6.26533	6.81879	7.54882	8.56177	7.45742
A_19_P00810812									12.515	0.002	1.40668	9.50242	9.55414	9.84282	10.7265	11.3046	11.0883
A_19_P00807840									20.633	0	1.41438	7.24088	7.18166	7.37993	8.60142	8.64936	8.79481
A_33_P3333033	SGSM2	small G protein signaling modulator 2		9905	Hs.513861	9455477, 12477932, 16169070, 17509819, 19077034, 19584346	GO:0005097: Rab GTPase activator activity, GO:0005622: intracellular, GO:0032313: regulation of Rab GTPase activity		7.307	0.015	1.41973	9.74743	9.83713	9.67638	11.2847	10.9952	11.2403
A_33_P3235184									12.018	0.003	1.46043	10.7902	11.1863	11.0572	12.3481	12.4165	12.6504
A_19_P00812362									12.383	0.003	1.468	7.71434	8.0061	8.27289	9.29448	9.8208	9.28207
A_33_P3407230									8.958	0.008	1.46997	7.88448	7.99169	7.8491	9.39781	9.09262	9.64474
A_33_P3362737									7.911	0.012	1.47153	10.4708	10.2585	10.6153	11.7264	12.1822	11.8506
A_24_P41149									8.727	0.009	1.47725	12.5954	12.7416	12.7879	14.1505	14.2404	14.1656
A_19_P00326033									9.069	0.008	1.48714	7.31212	7.25771	7.83047	8.8501	9.22044	8.79119
A_33_P3398196									6.203	0.024	1.4936	10.0969	9.76766	10.0303	11.2239	11.5012	11.6505
A_19_P00324582									7.116	0.016	1.50566	11.1471	11.3064	11.1073	12.7753	12.3032	12.9993
A_24_P306469									13.301	0.002	1.51259	11.8263	11.9986	12.1971	13.3972	13.7344	13.4281
A_33_P3252491									8.89	0.008	1.56159	9.04687	9.19541	9.15203	10.7942	10.6626	10.6223
A_19_P00808377									6.621	0.02	1.56356	10.0375	9.72785	9.70782	11.2875	11.2857	11.5907
A_32_P148345	ANXA2	annexin A2		302	Hs.511605	1531641, 1602151, 1825830, 1999197, 2138016, 2148288, 2174397, 2456953, 2946940, 2969496, 3013422, 7510700, 7518469, 7821789, 7851890, 7961821, 8110754, 8117306, 8125298, 8449982, 8636985, 8834809, 8898866, 8955167, 9373149, 9515022, 9886297, 10077593, 10213612, 10512675, 10777578, 10809787, 11106497, 11108961, 11295233, 11781322, 11790298, 11978811, 12045186, 12171929, 12468550, 12477932, 126282…	GO:0001501: skeletal system development, GO:0001525: angiogenesis, GO:0004859: phospholipase inhibitor activity, GO:0005509: calcium ion binding, GO:0005515: protein binding, GO:0005544: calcium-dependent phospholipid binding, GO:0005546: phosphatidylinositol-4,5-bisphosphate binding, GO:0005576: extracellular region, GO:0005604: basement membrane, GO:0005625: soluble fraction, GO:0005737: cytopl…		10.148	0.005	1.58895	8.79137	8.937	8.97906	10.4316	10.3563	10.6863
A_19_P00327662									8.652	0.009	1.59006	7.5185	7.44235	7.70791	9.08217	9.39807	8.9587
A_33_P3304081									14.24	0.002	1.60787	10.3895	10.4267	10.6972	12.0057	12.0665	12.2649
A_24_P384200									9.451	0.007	1.61681	8.18005	9.13427	9.07865	10.462	10.7537	10.0277
A_33_P3235831									8.531	0.009	1.62952	7.88385	7.81708	7.75347	9.63575	9.14618	9.56103
A_24_P204238									9.404	0.007	1.64727	7.00671	7.31234	7.63397	8.59172	9.29981	9.00331
A_24_P24002									18.112	0.001	1.66466	7.08907	7.22264	7.36275	8.74871	8.8609	9.05882
A_24_P58242									8.178	0.011	1.66603	11.5239	11.7175	11.5434	13.2425	13.1486	13.3919
A_24_P24972									14.449	0.001	1.68231	10.8194	10.4495	10.5875	12.1845	12.2514	12.4675
A_33_P3343605									8.919	0.008	1.68753	7.14607	7.18839	7.23286	8.83284	8.69031	9.10677
A_19_P00325462									12.14	0.003	1.69748	10.5045	10.2449	10.6002	12.1737	12.2242	12.0441
A_19_P00805393									9.671	0.006	1.70677	9.05777	8.92312	9.31597	10.6732	11.0781	10.6658
A_33_P3391803									10.535	0.004	1.70745	9.49951	9.47226	9.71287	11.2229	11.4096	11.1745
A_19_P00812710									10.757	0.004	1.72199	8.2901	8.15972	8.61403	9.9331	10.2863	10.0104
A_24_P307306									6.166	0.025	1.74962	10.1801	9.94977	9.95053	11.8478	11.8434	11.638
A_24_P418536									8.818	0.008	1.77117	10.4558	10.5922	10.7067	12.4012	12.3225	12.3445
A_33_P3259861	REREP3	arginine-glutamic acid dipeptide (RE) repeats pseudogene 3		646396	Hs.451294				8.819	0.008	1.77709	10.1277	10.2541	10.5279	11.745	11.7032	12.7927
A_23_P255827	FKSG2	tumor protein, translationally-controlled 1 pseudogene		59347			GO:0005737: cytoplasm, GO:0006915: apoptosis		13.525	0.002	1.8016	9.1736	9.13961	9.34409	10.9876	11.0136	11.061
A_33_P3590279									7.798	0.012	1.81546	11.579	11.7173	11.6072	13.3841	13.3214	13.6444
A_33_P3235454									12.656	0.002	1.8198	12.3957	12.3858	12.4049	14.2835	14.165	14.1973
A_33_P3360525									10.788	0.004	1.82841	12.0702	12.2321	12.3139	13.9289	14.1055	14.0671
A_19_P00331683									8.127	0.011	1.83116	7.76768	7.69686	7.82101	9.51465	9.55505	9.70933
A_33_P3216192									8.217	0.01	1.92964	11.0707	11.1183	11.0871	12.9156	12.7903	13.3591
A_19_P00325171									10.289	0.005	1.93012	9.46008	9.22603	9.71741	11.3307	11.6778	11.1853
A_33_P3209386	TXNDC17	thioredoxin domain containing 17		84817	Hs.408236	12477932, 14607843, 14607844, 15355959, 15489334, 18579519	GO:0004601: peroxidase activity, GO:0005515: protein binding, GO:0005737: cytoplasm, GO:0005829: cytosol, GO:0009055: electron carrier activity, GO:0033209: tumor necrosis factor-mediated signaling pathway, GO:0047134: protein-disulfide reductase activity		12.897	0.002	1.93552	9.34137	9.25959	9.40484	11.1497	11.4604	11.2023
A_24_P92267									17.819	0.001	1.94799	7.63186	8.21546	8.07708	10.0068	9.90206	9.85953
A_24_P161914									11.922	0.003	1.99388	11.6993	11.9961	11.7617	13.765	13.9097	13.764
A_19_P00800271									10.586	0.004	2.03126	7.62431	7.25998	7.42426	9.39968	9.17711	9.82552
A_19_P00800474									9.326	0.007	2.15385	9.34854	9.50195	9.3619	11.3628	11.4802	11.8309
A_24_P255384									11.481	0.003	2.20902	9.81775	9.9763	10.2357	12.1824	12.276	12.1984
A_19_P00807493									6.15	0.025	2.67564	7.49648	7.78907	9.11606	10.3401	10.7807	11.3078

## Sheet: Genes unique to Ctrl_96h - PXN_
Probe	Symbol	Description	GenBank	Gene	UniGene	PubMed	Gene Ontology	Pathway	F-statistic	p-value	Fold change	Ctrl_A_96h	Ctrl_B_96h	Ctrl_C_96h	PXN_A_96h	PXN_B_96h	PXN_C_96h
A_24_P66838									30.866	0	-1.038	6.71823	6.9574	6.89099	7.82532	7.77001	8.08452
A_33_P3283237	YY2	YY2 transcription factor		404281	Hs.443490, Hs.673601	12477932, 14702039, 15087442, 16260628, 16344560, 16377127, 17478514, 19026728, 19710015, 20215434	GO:0003677: DNA binding, GO:0005622: intracellular, GO:0005634: nucleus, GO:0008270: zinc ion binding, GO:0045449: regulation of transcription, GO:0046872: metal ion binding		26.913	0	-1.176	9.17226	9.15355	8.96901	10.3346	9.99144	10.4957
A_32_P45974	C2orf27A	chromosome 2 open reading frame 27A		29798	Hs.635289, Hs.655680	8619474, 9110174, 12477932, 15489334, 15815621			21.175	0	-1.017	6.51654	6.64197	6.69518	7.69672	7.70379	7.50429
A_19_P00807840									20.633	0	-1.414	7.24088	7.18166	7.37993	8.60142	8.64936	8.79481
A_19_P00801106									19.724	0	-1.16	8.71987	8.80149	8.64489	10.0228	9.56357	10.06
A_33_P3378707	LOC646214	p21-activated kinase 2 pseudogene		646214	Hs.510697				19.191	0	-1.004	9.58356	9.91467	9.84583	10.8968	10.8469	10.6132
A_24_P24002									18.112	0.001	-1.665	7.08907	7.22264	7.36275	8.74871	8.8609	9.05882
A_24_P92267									17.819	0.001	-1.948	7.63186	8.21546	8.07708	10.0068	9.90206	9.85953
A_33_P3317473									17.667	0.001	-1.311	8.66199	8.75259	8.71561	9.93351	9.89727	10.2323
A_33_P3384900	SNRPD2P2	small nuclear ribonucleoprotein D2 pseudogene 2		645339	Hs.382049	12477932			17.038	0.001	-1.391	9.78938	9.94393	10.1571	11.2865	11.6153	11.1605
A_33_P3297452									16.213	0.001	-1.133	6.98097	6.97955	6.92645	8.03427	7.89305	8.3576
A_33_P3210975									15.941	0.001	-1.097	7.18858	7.57352	7.75089	8.57154	8.61075	8.62071
A_19_P00802929									15.626	0.001	-1.339	8.01551	8.30025	8.30353	9.5136	9.47093	9.6524
A_24_P297480	RNF113B	ring finger protein 113B		140432	Hs.296045	12477932, 15057823, 15489334	GO:0003676: nucleic acid binding, GO:0005515: protein binding, GO:0008270: zinc ion binding, GO:0046872: metal ion binding		14.771	0.001	-1.045	6.98536	6.89926	7.18447	7.81543	8.15246	8.23715
A_24_P24972									14.449	0.001	-1.682	10.8194	10.4495	10.5875	12.1845	12.2514	12.4675
A_33_P3304081									14.24	0.002	-1.608	10.3895	10.4267	10.6972	12.0057	12.0665	12.2649
A_19_P00806684									14.058	0.002	-1.051	7.45888	7.20156	7.29938	8.15422	8.24569	8.71432
A_23_P255827	FKSG2	tumor protein, translationally-controlled 1 pseudogene		59347			GO:0005737: cytoplasm, GO:0006915: apoptosis		13.525	0.002	-1.802	9.1736	9.13961	9.34409	10.9876	11.0136	11.061
A_24_P306469									13.301	0.002	-1.513	11.8263	11.9986	12.1971	13.3972	13.7344	13.4281
A_24_P175563	ACBD5	acyl-CoA binding domain containing 5		91452	Hs.530597	12056414, 12477932, 14702039, 15342556, 16385451	GO:0000062: acyl-CoA binding, GO:0006810: transport, GO:0008289: lipid binding, GO:0016020: membrane, GO:0016021: integral to membrane		13.272	0.002	-1.162	6.14489	6.33496	6.52173	7.41858	7.77222	7.29794
A_33_P3352980									13.059	0.002	-1.194	8.19244	8.38911	8.07983	9.40016	9.2617	9.58295
A_33_P3209386	TXNDC17	thioredoxin domain containing 17		84817	Hs.408236	12477932, 14607843, 14607844, 15355959, 15489334, 18579519	GO:0004601: peroxidase activity, GO:0005515: protein binding, GO:0005737: cytoplasm, GO:0005829: cytosol, GO:0009055: electron carrier activity, GO:0033209: tumor necrosis factor-mediated signaling pathway, GO:0047134: protein-disulfide reductase activity		12.897	0.002	-1.936	9.34137	9.25959	9.40484	11.1497	11.4604	11.2023
A_33_P3235454									12.656	0.002	-1.82	12.3957	12.3858	12.4049	14.2835	14.165	14.1973
A_19_P00810812									12.515	0.002	-1.407	9.50242	9.55414	9.84282	10.7265	11.3046	11.0883
A_33_P3392123	LOC100233209	hypothetical LOC100233209		100233209	Hs.657722	14702039, 16344560			12.433	0.002	-1.245	8.50117	8.55865	8.41324	9.76933	9.49591	9.94245
A_19_P00812362									12.383	0.003	-1.468	7.71434	8.0061	8.27289	9.29448	9.8208	9.28207
A_24_P865672									12.333	0.003	-1.389	6.59829	6.77656	6.90096	8.04129	8.42462	7.97674
A_19_P00801713									12.303	0.003	-1.334	11.5364	11.6538	11.691	13.1037	13.2579	12.5223
A_33_P3279501									12.187	0.003	-1.112	6.41158	6.56519	6.70722	7.70408	7.88769	7.42675
A_24_P277367	CXCL5	chemokine (C-X-C motif) ligand 5		6374	Hs.89714	1744577, 7828901, 7929219, 7999089, 8083342, 8580362, 8702798, 9252512, 9365115, 9692902, 10068592, 10095777, 10463948, 10820279, 11106948, 11468158, 12468547, 12477932, 12665801, 12680872, 12751040, 12950257, 13679321, 13679391, 14644041, 14711052, 14967364, 15021975, 15489334, 15714497, 16567110, 16574090, 16635746, 17022986, 17052298, 17428364, 17479287, 17549409, 17703412, 17761179, 17878384,…	GO:0005576: extracellular region, GO:0005615: extracellular space, GO:0006935: chemotaxis, GO:0006955: immune response, GO:0007165: signal transduction, GO:0007267: cell-cell signaling, GO:0008009: chemokine activity, GO:0008284: positive regulation of cell proliferation	04060: Cytokine-cytokine receptor interaction, 04062: Chemokine signaling pathway	12.16	0.003	-1.295	9.35935	9.6493	9.61812	10.6878	10.8941	10.93
A_33_P3358851									12.161	0.003	-1.329	6.44471	7.03569	6.94068	8.09109	8.31882	7.99677
A_19_P00325462									12.14	0.003	-1.697	10.5045	10.2449	10.6002	12.1737	12.2242	12.0441
A_33_P3235184									12.018	0.003	-1.46	10.7902	11.1863	11.0572	12.3481	12.4165	12.6504
A_24_P161914									11.922	0.003	-1.994	11.6993	11.9961	11.7617	13.765	13.9097	13.764
A_19_P00329691									11.91	0.003	-1.141	8.13267	8.36398	8.42448	9.37791	9.66537	9.30217
A_24_P662366									11.883	0.003	-1.305	8.77729	9.05153	8.95779	10.1872	9.98617	10.5283
A_32_P144342	PARP4	poly (ADP-ribose) polymerase family, member 4		143	Hs.117825	7937745, 8724849, 10100603, 10477748, 10551828, 10644454, 11291045, 11479319, 11855821, 12101391, 12123754, 12140175, 12404116, 12477932, 12829019, 15057823, 15169895, 15781132, 16344560, 17203305, 18676680, 19170196, 19536092, 19625176, 19692168, 20379614	GO:0003677: DNA binding, GO:0003950: NAD+ ADP-ribosyltransferase activity, GO:0003950: NAD+ ADP-ribosyltransferase activity, GO:0005622: intracellular, GO:0005634: nucleus, GO:0005737: cytoplasm, GO:0005856: cytoskeleton, GO:0005876: spindle microtubule, GO:0006281: DNA repair, GO:0006464: protein modification process, GO:0006471: protein amino acid ADP-ribosylation, GO:0006810: transport, GO:000…	03410: Base excision repair	11.773	0.003	-1.066	6.8059	6.89407	6.94421	7.89798	7.85451	8.08918
A_24_P255384									11.481	0.003	-2.209	9.81775	9.9763	10.2357	12.1824	12.276	12.1984
A_33_P3224971									11.479	0.003	-1.08	11.9507	11.8306	11.5402	12.7412	12.6438	13.1774
A_23_P372923	FGFR1	fibroblast growth factor receptor 1		2260	Hs.264887	1317750, 1379697, 1379698, 1380281, 1650441, 1652059, 1662973, 1689310, 1697263, 1722570, 1722683, 1846977, 2159626, 2162671, 2167437, 2554327, 7514169, 7516330, 7537362, 7680645, 7761103, 7789168, 7874169, 8074689, 8125298, 8386828, 8417497, 8576175, 8622701, 8663044, 8692946, 8737680, 8752212, 8753773, 8756477, 8929854, 9139660, 9212826, 9373149, 9480847, 9632781, 9655399, 9660748, 9949182, 103…	GO:0000165: MAPKKK cascade, GO:0000166: nucleotide binding, GO:0001501: skeletal system development, GO:0001525: angiogenesis, GO:0001657: ureteric bud development, GO:0001701: in utero embryonic development, GO:0001759: induction of an organ, GO:0002053: positive regulation of mesenchymal cell proliferation, GO:0002062: chondrocyte differentiation, GO:0004713: protein tyrosine kinase activity, G…	04010: MAPK signaling pathway, 04520: Adherens junction, 04810: Regulation of actin cytoskeleton, 05200: Pathways in cancer, 05215: Prostate cancer, 05218: Melanoma	11.024	0.004	1.048	10.4527	10.2099	10.2458	9.58012	9.2014	8.98285
A_24_P195286									11.008	0.004	-1.075	7.42901	7.52377	7.53871	8.52629	8.54264	8.64848
A_19_P00809160									10.95	0.004	-1.007	7.44769	7.62263	7.62099	8.67149	8.28739	8.75402
A_33_P3360525									10.788	0.004	-1.828	12.0702	12.2321	12.3139	13.9289	14.1055	14.0671
A_19_P00812710									10.757	0.004	-1.722	8.2901	8.15972	8.61403	9.9331	10.2863	10.0104
A_24_P323635									10.6	0.004	-1.393	12.9259	12.8855	12.6633	14.2641	14.0541	14.3357
A_19_P00800271									10.586	0.004	-2.031	7.62431	7.25998	7.42426	9.39968	9.17711	9.82552
A_33_P3391803									10.535	0.004	-1.707	9.49951	9.47226	9.71287	11.2229	11.4096	11.1745
A_19_P00808589									10.461	0.005	-1.005	9.00683	9.13389	9.32941	10.0914	10.2285	10.1656
A_24_P917866	SET	SET nuclear oncogene		6418	Hs.436687	1630450, 7753797, 8125298, 8131851, 8192856, 8294483, 8626647, 9353299, 9373149, 9773788, 11018049, 11073993, 11076863, 11163245, 11231286, 11555662, 11741927, 11909973, 11978794, 12107410, 12407107, 12444089, 12477932, 12524539, 12628186, 14612398, 14671643, 14759373, 15136563, 15146197, 15164053, 15173575, 15342556, 15489334, 15489336, 15556635, 15642345, 15930275, 15931263, 16061203, 16189514,…	GO:0004864: phosphoprotein phosphatase inhibitor activity, GO:0005515: protein binding, GO:0005634: nucleus, GO:0005654: nucleoplasm, GO:0005737: cytoplasm, GO:0005783: endoplasmic reticulum, GO:0005829: cytosol, GO:0006260: DNA replication, GO:0006334: nucleosome assembly, GO:0006337: nucleosome disassembly, GO:0006913: nucleocytoplasmic transport, GO:0008601: protein phosphatase type 2A regulat…		10.336	0.005	-1.289	11.7416	11.7761	11.7376	12.8776	13.0736	13.1709
A_19_P00325171									10.289	0.005	-1.93	9.46008	9.22603	9.71741	11.3307	11.6778	11.1853
A_24_P203814									10.265	0.005	-1.05	8.88957	9.11785	9.12957	9.9983	10.1336	10.1549
A_33_P3322430									10.219	0.005	-1.024	11.3767	11.3088	11.1093	12.1396	12.1914	12.537
A_24_P58894									10.164	0.005	-1.04	10.5708	10.8501	10.8685	11.9103	11.9557	11.5439
A_32_P148345	ANXA2	annexin A2		302	Hs.511605	1531641, 1602151, 1825830, 1999197, 2138016, 2148288, 2174397, 2456953, 2946940, 2969496, 3013422, 7510700, 7518469, 7821789, 7851890, 7961821, 8110754, 8117306, 8125298, 8449982, 8636985, 8834809, 8898866, 8955167, 9373149, 9515022, 9886297, 10077593, 10213612, 10512675, 10777578, 10809787, 11106497, 11108961, 11295233, 11781322, 11790298, 11978811, 12045186, 12171929, 12468550, 12477932, 126282…	GO:0001501: skeletal system development, GO:0001525: angiogenesis, GO:0004859: phospholipase inhibitor activity, GO:0005509: calcium ion binding, GO:0005515: protein binding, GO:0005544: calcium-dependent phospholipid binding, GO:0005546: phosphatidylinositol-4,5-bisphosphate binding, GO:0005576: extracellular region, GO:0005604: basement membrane, GO:0005625: soluble fraction, GO:0005737: cytopl…		10.148	0.005	-1.589	8.79137	8.937	8.97906	10.4316	10.3563	10.6863
A_33_P3286789									10.001	0.005	-1.021	6.53794	6.72167	6.70015	7.77608	7.71559	7.53111
A_33_P3222018	CBX3	chromobox homolog 3		11335	Hs.381189	8663349, 9169472, 9454751, 9636146, 9636147, 9864353, 10330177, 10460410, 10562550, 10664448, 11101528, 11124534, 11242053, 11336697, 11793364, 11959914, 12004135, 12054505, 12414990, 12477932, 12485163, 12560555, 12690205, 15009096, 15120635, 15322135, 15489334, 15502821, 15635413, 16083285, 16127177, 16713569, 16945326, 16954381, 16964243, 17081983, 17245432, 17381543, 17468742, 17540172, 17575…	GO:0000779: condensed chromosome, centromeric region, GO:0000785: chromatin, GO:0003682: chromatin binding, GO:0005515: protein binding, GO:0005634: nucleus, GO:0005635: nuclear envelope, GO:0005637: nuclear inner membrane, GO:0005719: nuclear euchromatin, GO:0005720: nuclear heterochromatin, GO:0005819: spindle, GO:0006333: chromatin assembly or disassembly, GO:0006338: chromatin remodeling, GO:…		9.941	0.005	-1.374	6.78921	6.87927	7.24219	8.19576	8.6743	8.16406
A_33_P3325808									9.813	0.006	-1.256	7.55722	7.49629	7.55964	8.77136	8.68503	8.92375
A_23_P104762	YAP1	Yes-associated protein 1		10413	Hs.503692	7644498, 7782338, 9202023, 9305852, 10228168, 10562288, 11278422, 11278685, 11358867, 11604498, 11743730, 12118366, 12477932, 12535517, 12807903, 15023535, 15096513, 15302935, 15324660, 15800888, 15893728, 16061658, 16596258, 16772533, 16894141, 16964243, 17081983, 17110958, 17438369, 17502622, 17823615, 17889654, 17974916, 17980593, 18158288, 18175224, 18280240, 18413746, 18617895, 18640976, 187…	GO:0003713: transcription coactivator activity, GO:0003714: transcription corepressor activity, GO:0005515: protein binding, GO:0005634: nucleus, GO:0005737: cytoplasm, GO:0008283: cell proliferation, GO:0035329: hippo signaling cascade, GO:0045449: regulation of transcription, GO:0060242: contact inhibition		9.679	0.006	1.147	12.1144	11.7203	11.4981	10.5653	10.3594	10.9657
A_19_P00805393									9.671	0.006	-1.707	9.05777	8.92312	9.31597	10.6732	11.0781	10.6658
A_33_P3265606	GCLM	glutamate-cysteine ligase, modifier subunit		2730	Hs.315562	7826375, 7829101, 8825659, 8978789, 9675072, 9841137, 9841880, 9895302, 10395918, 10674357, 12081989, 12477932, 12975258, 14532974, 15451055, 15489334, 15946948, 16081425, 16183645, 16599007, 16677451, 16710414, 16712791, 16766924, 16909399, 17333241, 17344309, 17353931, 17548779, 17643973, 17924854, 17961430, 18066575, 18449862, 18560528, 18614560, 18991850, 19056482, 19126404, 19153097, 1942010…	GO:0004357: glutamate-cysteine ligase activity, GO:0004357: glutamate-cysteine ligase activity, GO:0005515: protein binding, GO:0005625: soluble fraction, GO:0005829: cytosol, GO:0006534: cysteine metabolic process, GO:0006536: glutamate metabolic process, GO:0006750: glutathione biosynthetic process, GO:0006750: glutathione biosynthetic process, GO:0006979: response to oxidative stress, GO:00164…	00480: Glutathione metabolism, 01100: Metabolic pathways	9.559	0.006	-1.06	12.0851	12.153	11.7261	13.2928	12.8949	12.9566
A_33_P3365878	BMP8B	bone morphogenetic protein 8b		656	Hs.664022	1460021, 7757816, 9070944, 10894154, 11427739, 12477932, 15063762, 16314833, 16710414, 17474147, 20379614	GO:0001501: skeletal system development, GO:0001503: ossification, GO:0005125: cytokine activity, GO:0005515: protein binding, GO:0005576: extracellular region, GO:0005615: extracellular space, GO:0007275: multicellular organismal development, GO:0008083: growth factor activity, GO:0030154: cell differentiation, GO:0040007: growth, GO:0051216: cartilage development	04340: Hedgehog signaling pathway, 04350: TGF-beta signaling pathway	9.51	0.006	-1.034	12.2965	12.1466	12.049	13.065	13.0041	13.5242
A_24_P384200									9.451	0.007	-1.617	8.18005	9.13427	9.07865	10.462	10.7537	10.0277
A_24_P204238									9.404	0.007	-1.647	7.00671	7.31234	7.63397	8.59172	9.29981	9.00331
A_33_P3372705	SRGAP2P2	SLIT-ROBO Rho GTPase activating protein 2 pseudogene 2		647135	Hs.632517	12477932			9.361	0.007	1.01	10.5634	10.1746	9.98799	9.61548	8.86639	9.21398
A_19_P00800474									9.326	0.007	-2.154	9.34854	9.50195	9.3619	11.3628	11.4802	11.8309
A_23_P415411	HIST1H4E	histone cluster 1, H4e		8367	Hs.662174	9119399, 9439656, 9566873, 11080476, 11689053, 12408966, 12477932, 14657027		05322: Systemic lupus erythematosus	9.286	0.007	1.692	14.0682	13.6302	13.2213	11.9925	11.4843	12.3655
A_33_P3354728									9.202	0.007	-1.312	8.86548	9.06488	9.12646	10.3842	10.3945	10.2141
A_33_P3386288	SCD5	stearoyl-CoA desaturase 5		79966	Hs.379191	12477932, 12727354, 12815040, 15610069, 15907797, 16712791, 16806233, 17468887, 20379614	GO:0004768: stearoyl-CoA 9-desaturase activity, GO:0005506: iron ion binding, GO:0005783: endoplasmic reticulum, GO:0005789: endoplasmic reticulum membrane, GO:0006633: fatty acid biosynthetic process, GO:0016020: membrane, GO:0016021: integral to membrane, GO:0016491: oxidoreductase activity, GO:0046872: metal ion binding, GO:0055114: oxidation reduction	01040: Biosynthesis of unsaturated fatty acids, 03320: PPAR signaling pathway	9.198	0.007	-1.078	6.52164	6.75661	6.79865	7.85145	8.00348	7.45616
A_33_P3337719	LOC100134868	hypothetical LOC100134868		100134868	Hs.516956	12477932			9.149	0.007	-1.066	9.34711	9.44574	9.15031	10.4274	10.109	10.6051
A_32_P34	LOC100131581	hypothetical LOC100131581		100131581	Hs.638992	14702039			9.104	0.007	-1.292	10.3034	10.1725	10.3025	11.6872	11.4124	11.5544
A_19_P00326033									9.069	0.008	-1.487	7.31212	7.25771	7.83047	8.8501	9.22044	8.79119
A_33_P3407230									8.958	0.008	-1.47	7.88448	7.99169	7.8491	9.39781	9.09262	9.64474
A_33_P3343605									8.919	0.008	-1.688	7.14607	7.18839	7.23286	8.83284	8.69031	9.10677
A_33_P3252491									8.89	0.008	-1.562	9.04687	9.19541	9.15203	10.7942	10.6626	10.6223
A_24_P418536									8.818	0.008	-1.771	10.4558	10.5922	10.7067	12.4012	12.3225	12.3445
A_24_P41149									8.727	0.009	-1.477	12.5954	12.7416	12.7879	14.1505	14.2404	14.1656
A_33_P3390521	UBE2Z	ubiquitin-conjugating enzyme E2Z		65264	Hs.514297	12477932, 14702039, 15489334, 15761153, 16169070, 16189514, 16344560, 17160626, 17597759, 18029348	GO:0000166: nucleotide binding, GO:0004842: ubiquitin-protein ligase activity, GO:0005524: ATP binding, GO:0005634: nucleus, GO:0005730: nucleolus, GO:0005737: cytoplasm, GO:0006915: apoptosis, GO:0016874: ligase activity, GO:0043687: post-translational protein modification, GO:0051246: regulation of protein metabolic process	04120: Ubiquitin mediated proteolysis	8.71	0.009	1.01	8.13087	8.13563	8.23797	7.30364	7.39466	6.77522
A_19_P00327662									8.652	0.009	-1.59	7.5185	7.44235	7.70791	9.08217	9.39807	8.9587
A_33_P3241596									8.648	0.009	-1.031	11.8629	12.1048	11.6104	12.7645	12.7957	13.1122
A_24_P409402									8.56	0.009	-1.104	11.6847	11.3212	11.7276	12.738	12.7208	12.5863
A_33_P3235831									8.531	0.009	-1.63	7.88385	7.81708	7.75347	9.63575	9.14618	9.56103
A_33_P3313929	CCR6	chemokine (C-C motif) receptor 6		1235	Hs.46468	8125298, 8886020, 9070937, 9169459, 9186513, 9223454, 9294137, 9294138, 9373149, 10521347, 11001880, 11164896, 11714836, 11751947, 11994436, 12067311, 12070001, 12081481, 12149255, 12193700, 12477932, 12514792, 12642342, 14574404, 15483227, 15489334, 15591779, 15701269, 15972662, 16095490, 16215992, 16344560, 16622267, 16641550, 17075975, 17133360, 17171755, 17562763, 17615381, 18097022, 18218038…	GO:0004872: receptor activity, GO:0004930: G-protein coupled receptor activity, GO:0004950: chemokine receptor activity, GO:0005515: protein binding, GO:0005886: plasma membrane, GO:0005887: integral to plasma membrane, GO:0006928: cellular component movement, GO:0006935: chemotaxis, GO:0006955: immune response, GO:0006959: humoral immune response, GO:0006968: cellular defense response, GO:000716…	04060: Cytokine-cytokine receptor interaction, 04062: Chemokine signaling pathway	8.512	0.009	-1.011	7.76711	7.85906	6.99599	8.54752	8.42881	8.67738
A_33_P3321678									8.417	0.01	-1.091	8.92685	9.08078	8.82984	10.0023	9.8795	10.2273
A_24_P127312									8.39	0.01	-1.134	13.5879	13.9564	13.9295	14.9078	14.984	14.984
A_24_P289043									8.371	0.01	-1.398	6.29016	6.26533	6.81879	7.54882	8.56177	7.45742
A_33_P3216192									8.217	0.01	-1.93	11.0707	11.1183	11.0871	12.9156	12.7903	13.3591
A_24_P58242									8.178	0.011	-1.666	11.5239	11.7175	11.5434	13.2425	13.1486	13.3919
A_33_P3415221									8.154	0.011	-1.381	13.4329	13.1599	12.9004	14.4936	14.2428	14.901
A_19_P00331683									8.127	0.011	-1.831	7.76768	7.69686	7.82101	9.51465	9.55505	9.70933
A_33_P3273000	PTK2B	PTK2B protein tyrosine kinase 2 beta		2185	Hs.491322	1718748, 7499242, 7529876, 7544443, 7673154, 8497321, 8792832, 8798684, 8838818, 8849729, 8939945, 8995252, 9020138, 9091579, 9099734, 9104812, 9242628, 9344848, 9362541, 9402324, 9422762, 9442086, 9446638, 9512511, 9545257, 9560226, 9565592, 9621077, 9750131, 9858471, 10022914, 10022920, 10082674, 10194422, 10322114, 10329689, 10354709, 10356363, 10518561, 10521452, 10702271, 10708762, 10713673,…	GO:0000165: MAPKKK cascade, GO:0000166: nucleotide binding, GO:0001525: angiogenesis, GO:0001556: oocyte maturation, GO:0001666: response to hypoxia, GO:0004713: protein tyrosine kinase activity, GO:0004715: non-membrane spanning protein tyrosine kinase activity, GO:0004871: signal transducer activity, GO:0005515: protein binding, GO:0005524: ATP binding, GO:0005634: nucleus, GO:0005737: cytoplas…	04020: Calcium signaling pathway, 04062: Chemokine signaling pathway, 04650: Natural killer cell mediated cytotoxicity, 04670: Leukocyte transendothelial migration, 04912: GnRH signaling pathway	8.058	0.011	-1.08	9.79748	9.77113	9.69396	10.8903	10.6283	10.9848
A_33_P3397795	C14orf135	chromosome 14 open reading frame 135		64430	Hs.509499	11230166, 12477932, 14702039, 15489334, 16189514, 16237761, 18029348	GO:0016020: membrane, GO:0016021: integral to membrane		7.976	0.012	-1.012	9.97303	10.0884	9.81873	10.8022	10.9962	11.117
A_33_P3362737									7.911	0.012	-1.472	10.4708	10.2585	10.6153	11.7264	12.1822	11.8506
A_33_P3312802	RPL13AP17	ribosomal protein L13a pseudogene 17		399670	Hs.568045	12477932, 15479637, 19123937			7.836	0.012	-1.102	9.98078	9.52753	9.5621	10.6359	10.5316	11.2094
A_33_P3590279									7.798	0.012	-1.815	11.579	11.7173	11.6072	13.3841	13.3214	13.6444
A_33_P3384694									7.669	0.013	-1.084	7.39737	7.28678	7.19147	8.08742	7.978	9.06191
A_33_P3357626									7.658	0.013	-1.16	10.9849	10.7922	11.0595	11.9237	12.1306	12.2611
A_33_P3667484	LOC648740	actin, beta pseudogene		648740	Hs.721681				7.654	0.013	-1.285	11.8444	11.8312	11.6895	13.1457	12.8794	13.1942
A_33_P3228402									7.631	0.013	-1.079	11.8441	11.9739	11.8393	12.9434	12.7906	13.1616
A_23_P109907	ILDR1	immunoglobulin-like domain containing receptor 1		286676	Hs.98484	12477932, 14702039, 15381095, 15489334, 20379614	GO:0004872: receptor activity, GO:0005737: cytoplasm, GO:0005829: cytosol, GO:0005886: plasma membrane, GO:0016021: integral to membrane		7.524	0.014	-1.258	13.7169	13.7179	13.4711	14.7557	14.9148	15.0089
A_19_P00801142									7.33	0.015	-1.024	8.82846	8.48248	8.21872	9.50242	9.22315	9.87486
A_24_P384029									7.321	0.015	-1.089	6.77864	6.87874	7.14701	8.00368	8.13766	7.92957
A_33_P3333033	SGSM2	small G protein signaling modulator 2		9905	Hs.513861	9455477, 12477932, 16169070, 17509819, 19077034, 19584346	GO:0005097: Rab GTPase activator activity, GO:0005622: intracellular, GO:0032313: regulation of Rab GTPase activity		7.307	0.015	-1.42	9.74743	9.83713	9.67638	11.2847	10.9952	11.2403
A_19_P00320509									7.286	0.015	-1.316	8.99688	8.82078	9.22209	10.1247	10.5026	10.3594
A_19_P00324582									7.116	0.016	-1.506	11.1471	11.3064	11.1073	12.7753	12.3032	12.9993
A_33_P3294961	LAT2	linker for activation of T cells family, member 2		7462	Hs.647049	8125298, 8808592, 8812460, 9373149, 11003705, 11042152, 11124535, 12477932, 12486104, 12514734, 12853948, 14702039, 14722116, 15010370, 15153499, 15489334, 15745852, 16160011, 16713569, 17277102, 17993265, 18645037, 19183565, 19343046, 19808856, 19879355	GO:0005515: protein binding, GO:0005886: plasma membrane, GO:0016021: integral to membrane, GO:0019722: calcium-mediated signaling, GO:0023034: intracellular signaling pathway, GO:0042113: B cell activation, GO:0042113: B cell activation, GO:0042169: SH2 domain binding, GO:0043303: mast cell degranulation, GO:0045121: membrane raft, GO:0050853: B cell receptor signaling pathway		6.994	0.017	-1.095	11.1728	11.2975	10.789	12.0929	11.9391	12.5137
A_33_P3286709									6.914	0.018	-1.067	6.37017	6.27874	6.56857	7.21648	7.64719	7.55421
A_33_P3376925									6.894	0.018	-1.342	7.7035	7.69307	7.6274	8.94563	8.95672	9.14805
A_23_P117971									6.881	0.018	-1.122	12.2934	12.3296	11.9112	13.1971	13.1055	13.5968
A_23_P59888	NACAP1	nascent-polypeptide-associated complex alpha polypeptide pseudogene 1		83955	Hs.567608, Hs.723574	12477932, 17353931, 19615732	GO:0005515: protein binding		6.84	0.018	-1.297	12.8633	12.8393	12.8913	14.0615	14.0591	14.3635
A_33_P3274179	LOC100133791	hypothetical protein LOC100133791		100133791					6.697	0.02	-1.207	6.47752	6.36243	6.7425	7.7018	7.73964	7.76228
A_19_P00808377									6.621	0.02	-1.564	10.0375	9.72785	9.70782	11.2875	11.2857	11.5907
A_33_P3253460	LOC100130654	hypothetical protein LOC100130654		100130654	Hs.636509	14702039			6.318	0.023	-1.005	10.3349	9.46585	9.43289	10.6379	10.5017	11.1078
A_19_P00327588									6.282	0.023	1.391	8.61938	8.09239	7.6738	7.10364	6.41187	6.6971
A_19_P00806292									6.222	0.024	-1.093	8.81192	8.3006	7.90659	9.20221	8.988	10.107
A_33_P3398196									6.203	0.024	-1.494	10.0969	9.76766	10.0303	11.2239	11.5012	11.6505
A_24_P307306									6.166	0.025	-1.75	10.1801	9.94977	9.95053	11.8478	11.8434	11.638
A_33_P3374215									6.16	0.025	1.019	8.2207	8.08576	7.59477	7.21786	6.74013	6.88592
A_23_P350059	C1orf152	profilin 1 pseudogene		767846	Hs.657186	11948409, 12477932			6.15	0.025	-1.166	12.4294	11.92	12.1107	12.9576	13.1922	13.8069
A_23_P214897	AKAP12	A kinase (PRKA) anchor protein 12		9590	Hs.371240	1522245, 9000000, 9238861, 9604001, 9880537, 10858453, 11309381, 11316952, 11766078, 11807172, 12477932, 12857743, 14657015, 15258566, 15345747, 15590635, 15923193, 16344560, 16642035, 16762919, 17081159, 17081983, 17200117, 17442483, 17442832, 17577780, 18029348, 18199717, 18397319, 18554502, 18579430, 18950703, 19210988, 19724895, 19851296, 20018890, 20198315	GO:0005737: cytoplasm, GO:0005856: cytoskeleton, GO:0005938: cell cortex, GO:0006605: protein targeting, GO:0007165: signal transduction, GO:0007186: G-protein coupled receptor protein signaling pathway, GO:0008179: adenylate cyclase binding, GO:0010739: positive regulation of protein kinase A signaling cascade, GO:0030819: positive regulation of cAMP biosynthetic process, GO:0051018: protein kin…		5.896	0.028	1.031	11.3126	11.2354	10.9384	9.85998	10.0295	10.5037
A_33_P3424339									5.892	0.028	-1.39	10.1078	10.1812	10.2268	11.6573	11.5437	11.4834
A_33_P3293753	KRTAP10-9	keratin associated protein 10-9		386676	Hs.474000	10830953, 12477932, 14962103, 15028290	GO:0045095: keratin filament		5.671	0.031	-1.335	7.60603	7.5274	7.93384	8.79783	9.33598	8.937
A_33_P3297599									5.572	0.033	-1.061	13.0268	13.0288	12.7319	13.9669	13.8313	14.1721
A_19_P00811200									4.892	0.046	-1.3	7.41323	7.22389	7.1949	8.15408	8.78169	8.79731

## Sheet: common
Probe	Symbol	Description	GenBank	Gene	UniGene	PubMed	Gene Ontology	Pathway	F-statistic	p-value	Fold change for Ctrl_96h - MPX_96h	Fold change for Ctrl_96h - PXN_96h	Fold change for Ctrl_96h - siNTE_96h	Ctrl_A_96h	Ctrl_B_96h	Ctrl_C_96h	MPX_A_96h	MPX_B_96h	MPX_C_96h	PXN_A_96h	PXN_B_96h	PXN_C_96h	siNTE_A_96h	siNTE_B_96h	siNTE_D_96h
A_19_P00803130									18.807	0.001	1.271	1.236	1.199	8.11109	7.92861	7.65594	7.11677	6.56369	6.20291	6.81149	6.57326	6.6026	6.56122	6.65695	6.88005

## Sheet: inter
Probe	Symbol	Description	GenBank	Gene	UniGene	PubMed	Gene Ontology	Pathway	F-statistic	p-value	Fold change for Ctrl_96h - PXN_96h	Fold change for Ctrl_96h - siNTE_96h	Ctrl_A_96h	Ctrl_B_96h	Ctrl_C_96h	PXN_A_96h	PXN_B_96h	PXN_C_96h	siNTE_A_96h	siNTE_B_96h	siNTE_D_96h
A_33_P3280811	TTC16	tetratricopeptide repeat domain 16		158248	Hs.642748	12477932, 14702039, 15164053, 15489334	GO:0005488: binding		15.56	0.001	-1.066	-1.447	7.58312	8.02824	8.12213	8.82387	8.89345	9.21322	9.95954	9.41037	8.70439
A_24_P232790	C14orf162	chromosome 14 open reading frame 162		56936	Hs.458319	12477932, 15489334			13.522	0.002	1.188	1.921	10.1346	9.79748	9.5708	8.84487	8.14693	8.94628	7.68792	8.15481	7.89834
A_33_P3295091	LOC400804	hypothetical LOC400804		400804	Hs.722626	12477932			13.288	0.002	1.237	1.329	8.18444	8.32177	7.80243	7.22733	6.64561	6.72378	6.40304	6.81567	7.10254
A_19_P00805929									12.799	0.002	-1.287	-1.197	7.27715	6.99064	7.16485	8.04752	8.30991	8.93562	8.76413	8.29772	7.96157
A_19_P00316726									9.819	0.006	1.091	1.518	9.95788	10.0243	9.67253	8.99646	8.6059	8.78032	8.20615	8.24157	8.65437
A_33_P3420852	KIRREL2	kin of IRRE like 2 (Drosophila)		84063	Hs.145729	8889548, 11230166, 12477932, 12504092, 12837264, 12975309, 15340161, 15489334, 16741999, 19703278, 20237496	GO:0005886: plasma membrane, GO:0007155: cell adhesion, GO:0016021: integral to membrane		9.397	0.007	-1.014	-1.242	9.24582	8.57874	8.55466	9.81452	9.44295	10.1637	10.5009	10.0809	9.52229
A_33_P3259861	REREP3	arginine-glutamic acid dipeptide (RE) repeats pseudogene 3		646396	Hs.451294				8.819	0.008	-1.777	-1.25	10.1277	10.2541	10.5279	11.745	11.7032	12.7927	12.0109	11.6233	11.0268
A_19_P00330133									8.739	0.009	1.69	1.653	11.222	11.0837	10.5404	9.67051	8.86111	9.24377	8.94755	9.25939	9.68013
A_33_P3230090	LUZP6	leucine zipper protein 6		767558	Hs.602015	16344560, 16982933			8.403	0.01	1.565	1.46	11.3609	11.0786	10.5808	9.71641	9.17985	9.42897	9.24321	9.62073	9.77721
A_24_P223384	HIST1H2AB	histone cluster 1, H2ab		8335	Hs.248174	6647026, 9119399, 9439656, 9566873, 11080476, 11689053, 12408966, 12477932, 14657027, 14993289, 15010469, 15078818, 15386022, 15635413, 15823041, 16359901, 16702407, 20379614	GO:0000786: nucleosome, GO:0003677: DNA binding, GO:0005634: nucleus, GO:0005694: chromosome, GO:0006334: nucleosome assembly	05322: Systemic lupus erythematosus	8.265	0.01	1.233	1.011	10.9202	10.783	10.3073	9.64734	9.06615	9.59688	9.20103	9.7299	10.0477
A_24_P298027	AXIN2	axin 2		8313	Hs.156527	8889548, 9566905, 10021369, 10049590, 10647780, 10966653, 11017067, 11438668, 11474173, 11940574, 12072559, 12183362, 12477932, 15042511, 15304487, 15489334, 15611123, 15766563, 16247484, 16344560, 16432638, 16601693, 16820935, 16941501, 17002498, 17072303, 17143297, 17373666, 17927870, 18330950, 18372914, 18384130, 18676680, 18683894, 18708403, 18755497, 18790474, 19065536, 19119171, 19170196, 1…	GO:0001756: somitogenesis, GO:0001934: positive regulation of protein amino acid phosphorylation, GO:0001957: intramembranous ossification, GO:0004871: signal transducer activity, GO:0005622: intracellular, GO:0005634: nucleus, GO:0005737: cytoplasm, GO:0005813: centrosome, GO:0007275: multicellular organismal development, GO:0008013: beta-catenin binding, GO:0008285: negative regulation of cell …	04310: Wnt signaling pathway, 05200: Pathways in cancer, 05210: Colorectal cancer, 05213: Endometrial cancer, 05217: Basal cell carcinoma	7.939	0.012	1.003	1.135	8.18499	7.97961	7.74704	6.96637	6.93418	7.00233	6.69577	6.77012	7.04024
A_19_P00316067									6.861	0.018	-1.287	-1.053	6.8213	6.97005	7.63706	8.23397	8.37652	8.6789	8.82411	8.1511	7.61244
A_19_P00807493									6.15	0.025	-2.676	-2.463	7.49648	7.78907	9.11606	10.3401	10.7807	11.3078	12.0785	10.8685	8.84283
